# Supplementary material for: Structural and Aggregation Features of a Human κ-Casein Fragment with Antitumor and Cell-Penetrating Properties
Source: PubMed Central journal article supplement (PMC6721048; doi:10.3390/molecules24162919), 2019-08-12
Supplement: molecules-24-02919-s001.pdf [file molecules-24-02919-s001.pdf]

# Structural and aggregation features of human milk $\kappa$ -casein with antitumor and cell-penetrating properties

Olga Chinak<sup>1</sup>, Andrey Shernyukov<sup>2,3</sup>, Sergey Ovcherenko<sup>2,3</sup>, Evgeniy Sviridov<sup>2,3</sup>, Victor Golyshev<sup>1</sup>,  
Alexandr Fomin<sup>1</sup>, Inna Pyshnaya<sup>1</sup>, Elena Kuligina<sup>1</sup>, Vladimir Richter<sup>1</sup>, Elena Bagryanskaya<sup>2,3</sup>

<sup>1</sup> Institute of Chemical Biology and Fundamental Medicine SB RAS, Novosibirsk, Russia

<sup>2</sup> N.N. Vorozhtsov Novosibirsk Institute of Organic Chemistry SB RAS, Novosibirsk, Russia,

<sup>3</sup> Novosibirsk State University, 630090, Novosibirsk, Pirogova, 2, Russian Federation

## Electronic Supplementary Information

### Table of contents

|                                                                                                                                 |    |                                                                                                    |     |
|---------------------------------------------------------------------------------------------------------------------------------|----|----------------------------------------------------------------------------------------------------|-----|
| <b>Fig. S1.</b> Disorder prediction by DISOclust                                                                                | S2 | <b>Table 3</b> Relaxation data and SSP results for RL2 at pH 3.5                                   | S11 |
| <b>Fig. S2.</b> RL2 particle diameters in different pH and ionic strength.                                                      | S3 | <b>Table 4</b> Chemical shifts of RL2 at pH=3.9 (Acetate buffer)                                   | S14 |
| <b>Fig. S3.</b> HSQC spectra of RL2 at pH 7 (left) and pH 3.5 (right)                                                           | S4 | <b>Fig. S6.</b> Comparison of protein $\langle T_1 \rangle$ values                                 | S17 |
| <b>Fig. S4.</b> HSQC spectra of RL2 in H <sub>2</sub> O (left), 50% TFE (right) and their combination (bottom).                 | S5 | <b>Fig. S7. Fragment</b> <sup>1</sup> H NMR spectrum of RL2 before and after TCEP addition.        | S18 |
| <b>Fig. S5.</b> HSQC spectra of [U- <sup>13</sup> C, <sup>15</sup> N]-RL2 at pH=3.9 (blue, Acetate buffer) and pH 3.5 (orange). | S6 | <b>Fig. S8.</b> Gel filtration chromatograms showing the separation of RL2 dimer from the monomer. | S19 |
| <b>Table 1</b> Chemical shifts of RL2 at pH 3.5                                                                                 | S7 |                                                                                                    |     |
| <b>Table 2</b> The values of <sup>3</sup> J(HN-H $\alpha$ ) at pH 3.5                                                           | S9 |                                                                                                    |     |

## RL2 sequence:

|            |            |            |            |            |
|------------|------------|------------|------------|------------|
| MNQKQPACHE | NDERPFYQKT | APYVPMYYVP | NSYPYYGTNL | YQRRPAIAIN |
| NPYVPRTYYA | NPAVVRPHAQ | IPQRQYLPNS | HPPTVVRREN | LHPSFIAIPP |
| KKIQDKIIP  | TIGGSHHHHH | H          |            |            |

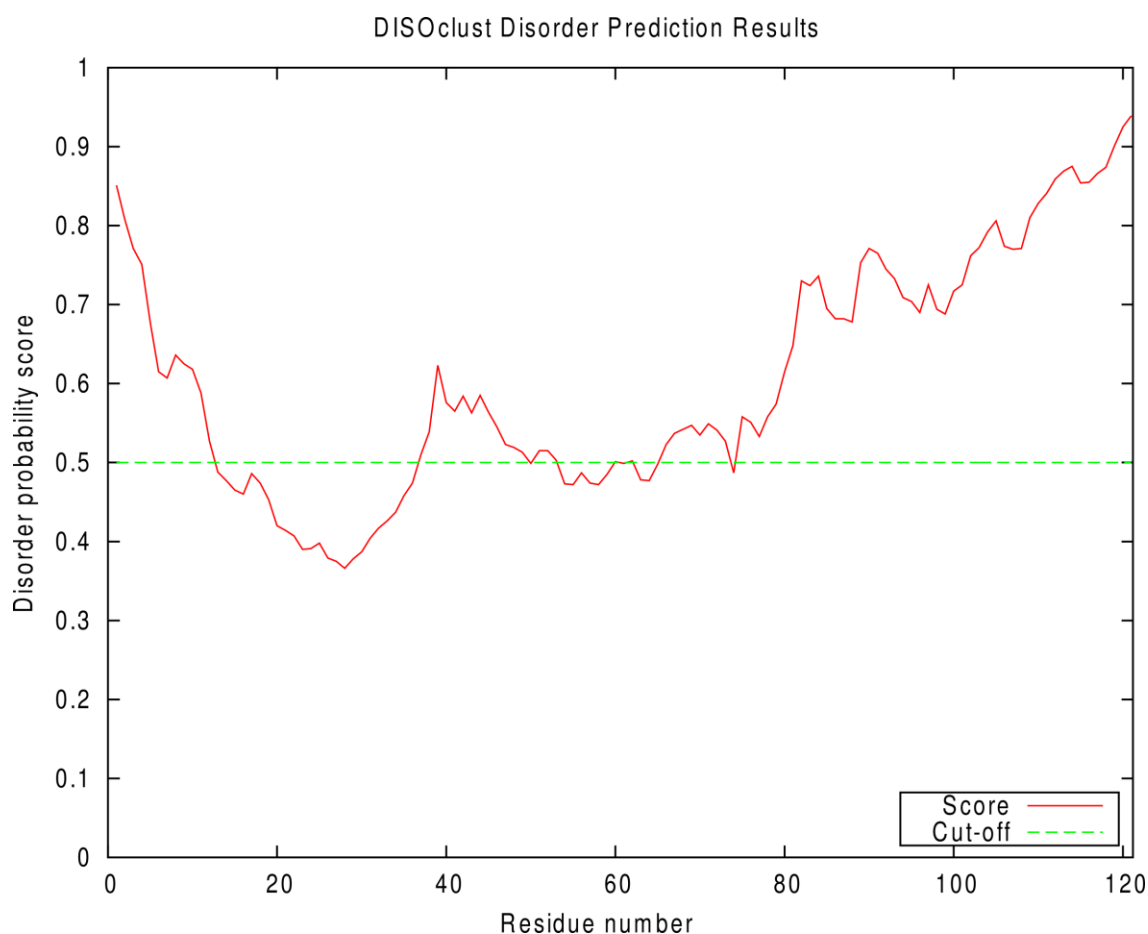

**Fig. S1.** Disorder prediction by DISOclust

Disorder prediction is carried out using DISOclust:

McGuffin, L. J. (2008) Intrinsic disorder prediction from the analysis of multiple protein fold recognition models. *Bioinformatics*, 24, 1789-1804

The results were obtained with the IntFOLD server:

McGuffin, L.J., Atkins, J., Salehe, B.R., Shuid, A.N. & Roche, D.B. (2015) IntFOLD: an integrated server for modelling protein structures and functions from amino acid sequences. *Nucleic Acids Research*, 43, W169-73. doi: 10.1093/nar/gkv236

Buenavista, M. T., Roche, D. B. & McGuffin, L. J. (2012) Improvement of 3D protein models using multiple templates guided by single-template model quality assessment. *Bioinformatics*, 28, 1851-1857. DOI: 10.1093/bioinformatics/bts292

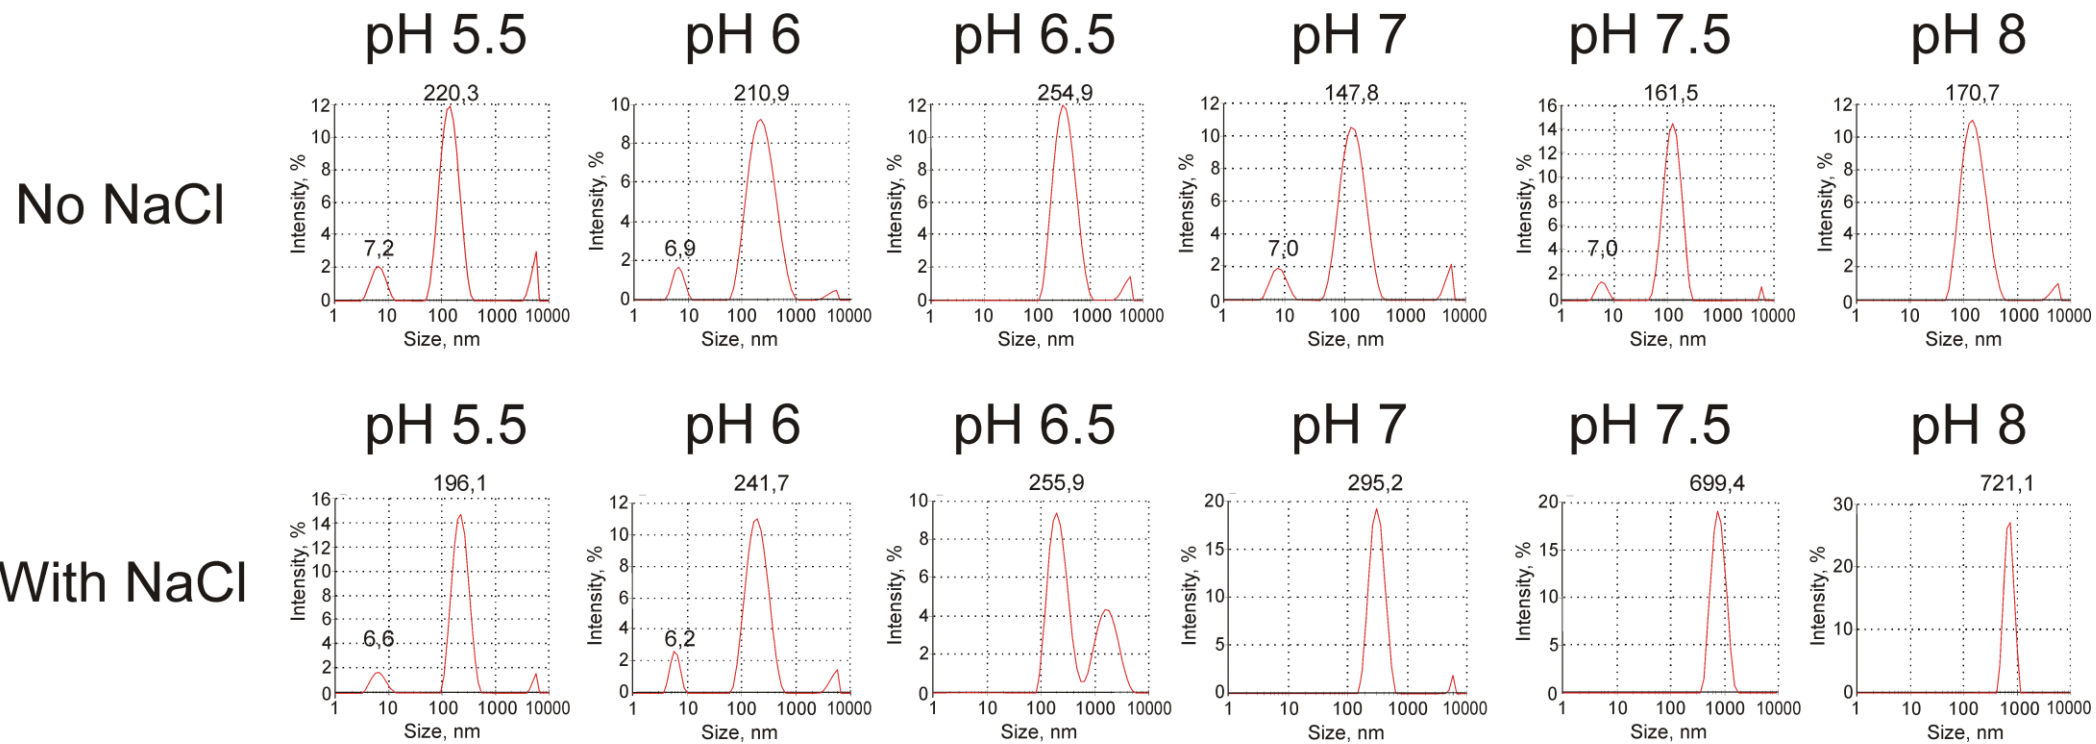

**Fig. S2.** RL2 particle diameters in different pH and ionic strength by DLS.

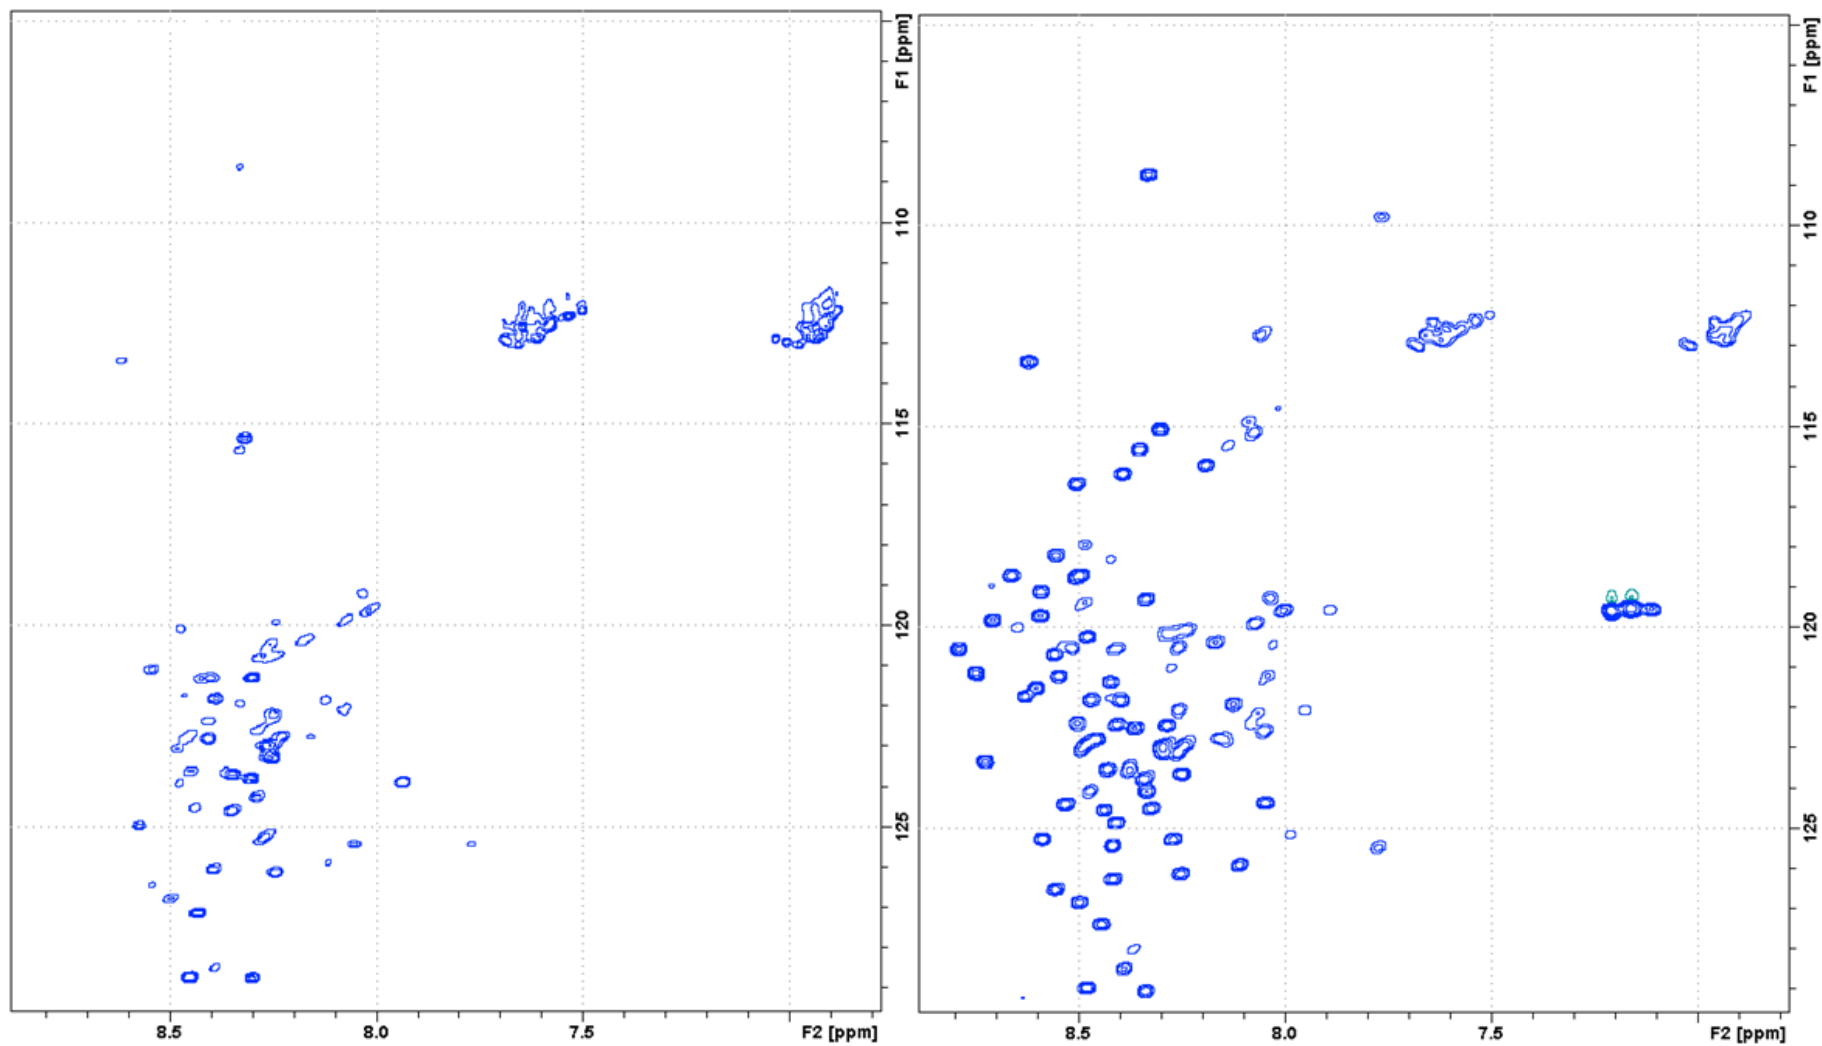

**Fig. S3.** HSQC spectra of RL2 at pH 7 (left) and pH 3.5 (right)

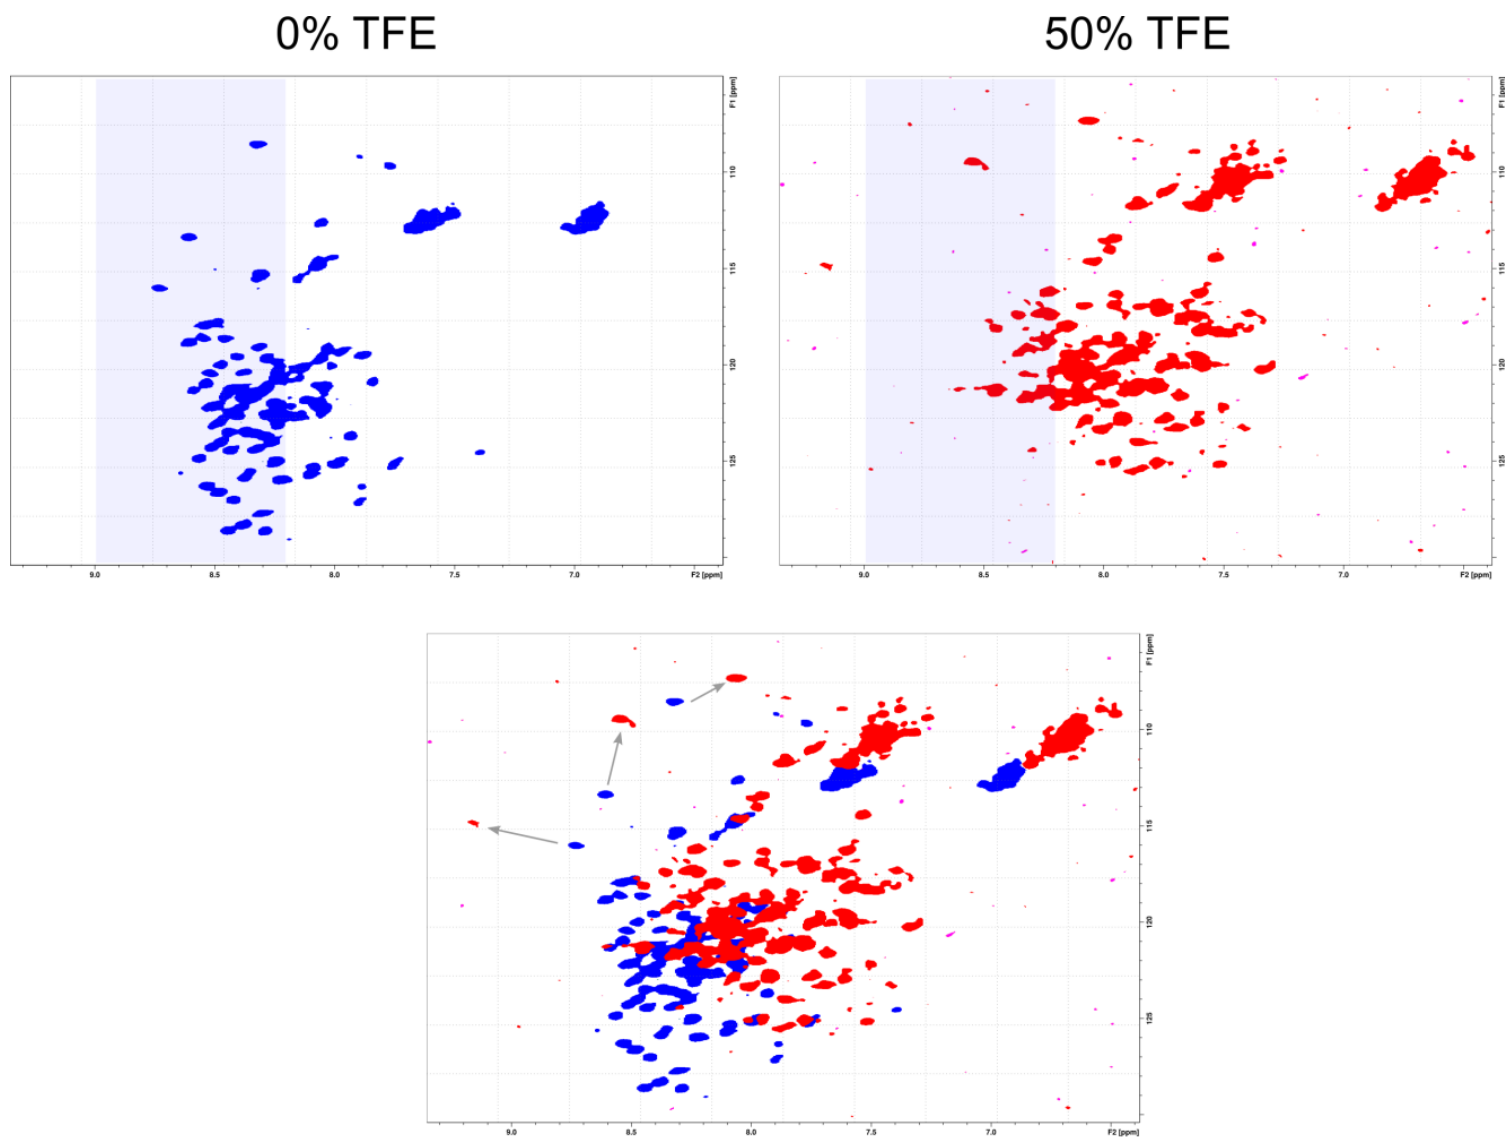

**Fig. S4.** HSQC spectra of RL2 in H<sub>2</sub>O (left), 50% TFE (right) and their **superimposition** (bottom). **Highlighted** region is characteristic for random-coil shifts:

- 1) Steven P. Mielke<sup>1</sup> and V.V. Krishnan. Characterization of protein secondary structure from NMR chemical shifts // Prog Nucl Magn Reson Spectrosc. 2009 Vol. 54(3-4). P. 141–165. doi:10.1016/j.pnmrs.2008.06.002.

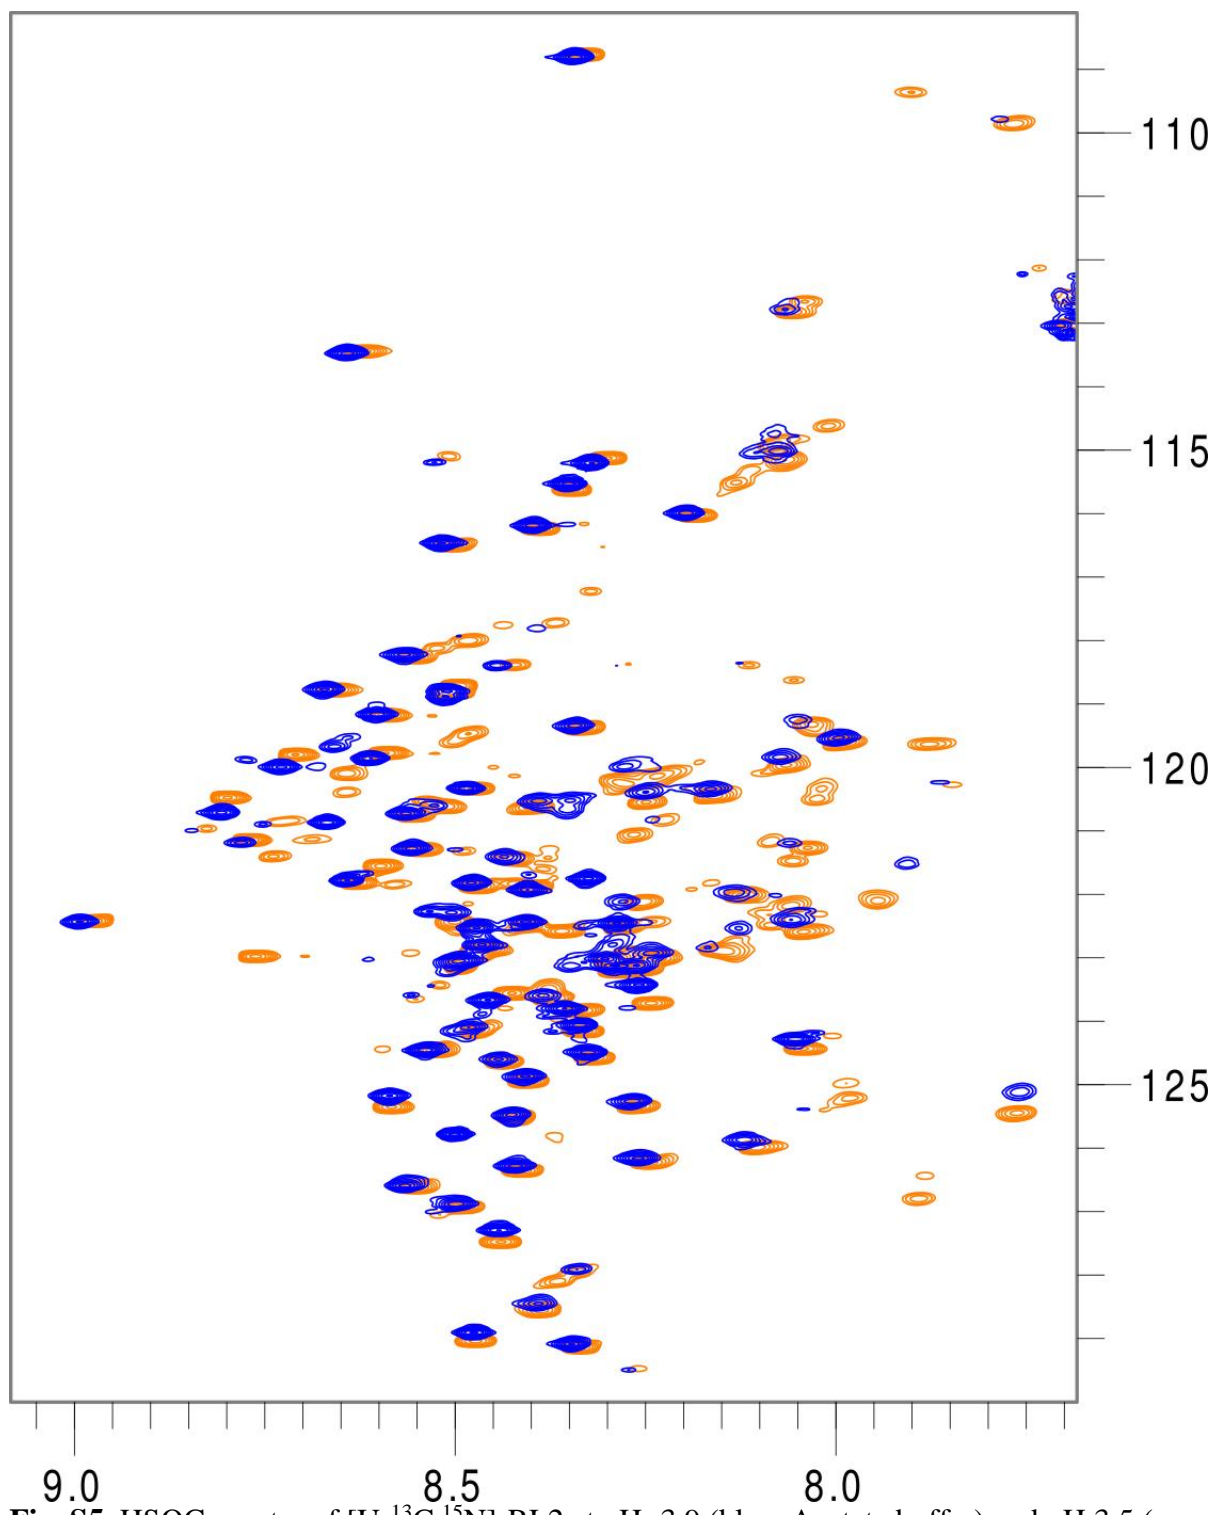

**Fig. S5.** HSQC spectra of [U-<sup>13</sup>C, <sup>15</sup>N]-RL2 at pH=3.9 (blue, Acetate buffer) and pH 3.5 (orange).

**Table 1 Chemical shifts of BME-RL2 at pH 3.5**

| N  |     | $\delta\text{H}$ | $\delta\text{N}$ | $\delta\text{H}^\alpha$ | $\delta\text{H}^\beta$ | $\delta\text{H}^\gamma$ | $\delta\text{H}^\delta$ | $\delta\text{C}'$ | $\delta\text{C}^\alpha$ | $\delta\text{C}^\beta$ |
|----|-----|------------------|------------------|-------------------------|------------------------|-------------------------|-------------------------|-------------------|-------------------------|------------------------|
| 1  | Met | -                | -                | 4.15                    | -                      | -                       | -                       | 172.05            | 55.05                   | 32.61                  |
| 2  | Asn | 8.98             | 122.42           | 4.77                    | -                      | -                       | -                       | 174.75            | -                       | -                      |
| 3  | Gln | 8.63             | 121.82           | 4.34                    | -                      | -                       | -                       | -                 | 55.83                   | 29.59                  |
| 4  | Lys | 8.49             | 123.10           | 4.30                    | -                      | -                       | -                       | 176.41            | 56.41                   | 32.88                  |
| 5  | Gln | 8.48             | 122.92           | 4.63                    | -                      | -                       | -                       | 173.93            | 53.55                   | 28.94                  |
| 6  | Pro | -                | -                | 4.40                    | -                      | -                       | -                       | 176.49            | 63.06                   | 31.99                  |
| 7  | Ala | 8.47             | 124.16           | 4.31                    | -                      | -                       | -                       | 177.61            | 52.48                   | 19.08                  |
| 8  | Cys | 8.42             | 118.34           | 4.64                    | -                      | -                       | -                       | 174.54            | 55.38                   | 41.09                  |
| 9  | His | 8.74             | 121.40           | 4.74                    | -                      | -                       | -                       | 174.05            | 55.20                   | 28.79                  |
| 10 | Glu | 8.42             | 121.87           | 4.36                    | -                      | -                       | -                       | 175.64            | 56.05                   | 28.73                  |
| 11 | Asn | 8.65             | 120.15           | 4.70                    | -                      | -                       | -                       | 175.01            | 53.42                   | 38.65                  |
| 12 | Asp | 8.49             | 119.46           | 4.72                    | -                      | -                       | -                       | 174.96            | 52.98                   | 37.86                  |
| 13 | Glu | 8.29             | 120.25           | 4.36                    | -                      | -                       | -                       | 175.69            | 55.86                   | 28.52                  |
| 14 | Arg | 8.29             | 123.04           | -                       | -                      | -                       | -                       | -                 | -                       | -                      |
| 16 | Phe | -                | -                | -                       | -                      | -                       | -                       | 175.19            | 57.93                   | 39.44                  |
| 17 | Tyr | 7.95             | 122.10           | 4.49                    | 2.91,<br>2.91          | -                       | -                       | 175.06            | 57.58                   | 38.96                  |
| 18 | Gln | 8.14             | 122.89           | 4.24                    | -                      | -                       | -                       | 175.27            | 55.38                   | 29.83                  |
| 19 | Lys | 8.38             | 123.51           | 4.26                    | -                      | -                       | -                       | 176.65            | 56.79                   | 32.93                  |
| 20 | Thr | 8.13             | 115.51           | 4.30                    | -                      | 1.22                    | -                       | 173.80            | 61.55                   | 69.81                  |
| 21 | Ala | 8.37             | 128.08           | 4.58                    | 1.38                   | -                       | -                       | 175.36            | 50.62                   | 18.10                  |
| 30 | Pro | -                | -                | 4.25                    | -                      | -                       | -                       | 176.60            | 63.21                   | 31.97                  |
| 31 | Asn | 8.48             | 118.06           | 4.56                    | 2.77,<br>2.77          | -                       | -                       | 174.96            | 53.70                   | 38.58                  |
| 32 | Ser | 8.08             | 114.92           | -                       | -                      | -                       | -                       | 173.63            | 58.23                   | 63.93                  |
| 33 | Tyr | 8.16             | 122.89           | 4.73                    | -                      | -                       | -                       | 174.09            | 55.89                   | 38.40                  |
| 36 | Tyr | -                | -                | 4.51                    | -                      | -                       | -                       | 176.05            | 57.97                   | 38.86                  |
| 37 | Gly | 7.77             | 109.85           | 3.89,<br>3.89           | -                      | -                       | -                       | 174.08            | 45.35                   | -                      |
| 38 | Thr | 8.06             | 112.81           | 4.35                    | -                      | 1.22                    | -                       | 174.51            | 61.83                   | 69.78                  |
| 39 | Asn | 8.52             | 120.59           | 4.68                    | 2.78,<br>2.78          | -                       | -                       | 175.26            | 53.39                   | 38.52                  |
| 40 | Leu | 8.13             | 122.05           | 4.18                    | -                      | -                       | 0.79,<br>0.79           | 177.17            | 55.86                   | 42.17                  |
| 41 | Tyr | 8.04             | 119.34           | 4.49                    | 3.01,<br>3.01          | -                       | -                       | 175.71            | 58.00                   | 38.32                  |
| 42 | Gln | 8.04             | 121.29           | 4.25                    | -                      | -                       | -                       | 175.39            | 55.89                   | 29.49                  |
| 43 | Arg | 8.26             | 122.12           | 4.27                    | -                      | -                       | -                       | 175.91            | 56.06                   | 30.62                  |
| 45 | Pro | -                | -                | -                       | -                      | -                       | -                       | 176.41            | 63.07                   | 32.00                  |
| 46 | Ala | 8.44             | 124.65           | 4.29                    | 1.37                   | -                       | -                       | 177.66            | 52.50                   | 19.06                  |
| 47 | Ile | 8.07             | 119.95           | 4.14                    | -                      | -                       | -                       | 175.75            | 60.95                   | 38.85                  |
| 48 | Ala | 8.39             | 128.53           | 4.36                    | 1.37                   | -                       | -                       | 177.41            | 52.35                   | 19.20                  |
| 49 | Ile | 8.16             | 120.45           | 4.13                    | -                      | -                       | -                       | 175.86            | 61.13                   | 38.83                  |
| 50 | Asn | 8.50             | 122.46           | 4.69                    | 2.74,<br>2.74          | -                       | -                       | 174.27            | 53.03                   | 39.01                  |
| 51 | Asn | 8.40             | 120.62           | 4.95                    | 2.76,<br>2.76          | -                       | -                       | 173.29            | 51.20                   | -                      |
| 55 | Pro | -                | -                | -                       | -                      | -                       | -                       | 176.76            | 62.98                   | 32.03                  |
| 56 | Arg | 8.42             | 121.42           | 4.31                    | -                      | -                       | -                       | 176.37            | 56.29                   | 30.80                  |

|    |     |      |        |      |               |               |               |        |       |       |
|----|-----|------|--------|------|---------------|---------------|---------------|--------|-------|-------|
| 57 | Thr | 8.07 | 115.14 | 4.25 | 4.06          | 1.08          | -             | 173.81 | 61.69 | 69.74 |
| 58 | Tyr | 8.23 | 123.00 | 4.51 | 2.89,<br>2.89 | -             | -             | 174.94 | 57.98 | 39.16 |
| 59 | Tyr | 8.05 | 122.59 | 4.48 | -             | -             | -             | 174.75 | 57.52 | 39.14 |
| 60 | Ala | 8.11 | 125.99 | 4.22 | -             | -             | -             | 176.62 | 51.97 | 19.32 |
| 61 | Asn | 8.33 | 119.38 | 4.88 | -             | -             | -             | 173.62 | 51.12 | 38.73 |
| 62 | Pro | -    | -      | -    | -             | -             | -             | 176.55 | 63.38 | 31.94 |
| 63 | Ala | 8.25 | 123.17 | 4.28 | 1.38          | -             | -             | 177.82 | 52.56 | 18.96 |
| 64 | Val | 7.99 | 119.59 | 4.07 | 2.08          | 0.93,<br>0.93 | -             | 176.01 | 62.30 | 32.63 |
| 65 | Val | 8.26 | 125.34 | 4.08 | 2.03          | 0.92,<br>0.92 | -             | 175.81 | 62.21 | 32.46 |
| 66 | Arg | 8.49 | 126.90 | 4.63 | -             | -             | 3.24,<br>3.24 | 173.99 | 53.70 | 30.05 |
| 67 | Pro | -    | -      | 4.38 | -             | -             | -             | 176.75 | 63.06 | 32.04 |
| 68 | His | 8.66 | 118.77 | 4.64 | 3.25,<br>3.25 | -             | -             | 174.09 | 55.26 | 28.86 |
| 69 | Ala | 8.42 | 125.50 | 4.31 | 1.39          | -             | -             | 177.51 | 52.45 | 19.25 |
| 70 | Gln | 8.56 | 120.76 | 4.36 | -             | -             | -             | 175.78 | 55.60 | 29.44 |
| 71 | Ile | 8.40 | 124.95 | 4.47 | 1.87          | -             | -             | -      | 58.76 | 38.55 |
| 72 | Pro | -    | -      | 4.42 | -             | -             | -             | 176.76 | 63.19 | 32.01 |
| 73 | Gln | 8.54 | 121.29 | 4.30 | -             | -             | -             | 176.11 | 55.97 | 29.59 |
| 74 | Arg | 8.46 | 122.86 | 4.27 | -             | -             | -             | 175.84 | 56.19 | 30.64 |
| 75 | Gln | 8.47 | 121.88 | 4.31 | -             | -             | -             | 175.27 | 55.75 | 29.70 |
| 76 | Tyr | 8.40 | 122.50 | 4.61 | -             | -             | -             | 175.09 | 57.63 | 38.87 |
| 77 | Leu | 8.25 | 126.23 | 4.62 | -             | -             | -             | -      | 52.55 | 42.04 |
| 78 | Pro | -    | -      | 4.33 | -             | -             | -             | 176.75 | 63.22 | 31.90 |
| 79 | Asn | 8.55 | 118.25 | 4.65 | 2.82,<br>2.82 | -             | -             | 175.21 | 53.24 | 38.52 |
| 80 | Ser | 8.19 | 116.03 | 4.39 | 3.83,<br>3.83 | -             | -             | 173.88 | 58.26 | 63.87 |
| 81 | His | 8.48 | 120.30 | 4.99 | -             | -             | -             | 171.79 | 53.29 | 28.47 |
| 83 | Pro | -    | -      | 4.53 | -             | -             | -             | 176.95 | 63.02 | 31.92 |
| 84 | Thr | 8.39 | 116.23 | 4.30 | 4.11          | 1.19          | -             | 174.41 | 61.97 | 69.72 |
| 85 | Val | 8.32 | 124.60 | 4.14 | 2.03          | 0.93,<br>0.93 | -             | 175.76 | 62.19 | 32.87 |
| 86 | Val | 8.41 | 126.34 | 4.06 | 1.98          | 0.93,<br>0.93 | -             | 175.86 | 62.29 | 32.64 |
| 87 | Arg | 8.55 | 126.62 | 4.36 | -             | -             | 3.20,<br>3.20 | 175.80 | 55.88 | 30.75 |
| 88 | Arg | 8.53 | 124.46 | 4.62 | -             | -             | 3.24,<br>3.24 | 174.20 | 53.91 | 30.16 |
| 89 | Pro | -    | -      | 4.38 | -             | -             | -             | 176.35 | 63.17 | 32.02 |
| 90 | Asn | 8.59 | 119.19 | 4.65 | 2.78,<br>2.78 | -             | -             | 175.06 | 52.94 | 38.48 |
| 91 | Leu | 8.29 | 123.04 | 4.28 | -             | -             | -             | 176.88 | 55.17 | 42.38 |
| 92 | His | 8.50 | 118.83 | 4.70 | 3.20,<br>3.20 | -             | -             | 172.04 | 53.06 | 28.81 |
| 93 | Pro | -    | -      | -    | -             | -             | -             | 176.85 | 63.23 | 32.06 |
| 94 | Ser | 8.51 | 116.51 | 4.43 | 3.84,<br>3.84 | -             | -             | 173.99 | 58.19 | 63.85 |
| 95 | Phe | 8.28 | 122.55 | 4.67 | 3.08,<br>3.08 | -             | -             | 174.99 | 57.73 | 39.78 |



|     |     |      |        |               |               |      |   |        |       |       |
|-----|-----|------|--------|---------------|---------------|------|---|--------|-------|-------|
| 96  | Ile | 8.04 | 124.41 | 4.07          | -             | -    | - | 174.99 | 60.51 | 38.86 |
| 97  | Ala | 8.34 | 129.13 | 4.28          | 1.36          | -    | - | 177.21 | 52.16 | 19.13 |
| 98  | Ile | 8.29 | 123.22 | 4.45          | -             | -    | - | -      | -     | -     |
| 100 | Pro | -    | -      | 4.44          | -             | -    | - | 176.91 | 62.76 | 32.02 |
| 101 | Lys | 8.40 | 121.90 | 4.25          | -             | -    | - | 176.61 | 56.34 | 33.08 |
| 102 | Lys | 8.43 | 123.56 | 4.33          | -             | -    | - | 176.40 | 56.25 | 33.04 |
| 103 | Ile | 8.34 | 123.83 | 4.16          | -             | -    | - | 176.15 | 61.02 | 38.60 |
| 104 | Gln | 8.59 | 125.35 | 4.35          | -             | -    | - | 175.44 | 55.62 | 29.51 |
| 105 | Asp | 8.60 | 121.56 | 4.71          | -             | -    | - | 174.75 | 52.86 | 38.18 |
| 106 | Lys | 8.36 | 122.58 | 4.33          | -             | -    | - | 176.01 | 56.31 | 32.99 |
| 107 | Ile | 8.24 | 123.72 | 4.14          | -             | -    | - | 175.88 | 60.97 | 38.54 |
| 108 | Ile | 8.44 | 127.48 | 4.18          | -             | -    | - | 175.90 | 60.46 | 38.40 |
| 109 | Ile | 8.47 | 129.04 | 4.48          | -             | -    | - | -      | -     | -     |
| 110 | Pro | -    | -      | 4.47          | -             | -    | - | 176.89 | 63.18 | 32.18 |
| 111 | Thr | 8.35 | 115.62 | 4.32          | 4.15          | 1.23 | - | 174.78 | 61.91 | 69.72 |
| 112 | Ile | 8.33 | 124.14 | 4.20          | 1.89          | -    | - | 176.88 | 61.33 | 38.66 |
| 113 | Gly | 8.63 | 113.43 | 3.99,<br>3.99 | -             | -    | - | 174.77 | 45.27 | -     |
| 114 | Gly | 8.33 | 108.76 | 3.97,<br>3.97 | -             | -    | - | 174.36 | 45.22 | -     |
| 115 | Ser | 8.30 | 115.13 | 4.35          | 3.79,<br>3.79 | -    | - | 174.78 | 58.27 | 63.68 |
| 116 | His | 8.59 | 119.76 | 4.67          | -             | -    | - | 174.21 | 55.13 | 28.33 |
| 117 | His | 8.50 | 118.71 | 4.68          | 3.17,<br>3.17 | -    | - | 174.16 | 55.17 | 28.81 |
| 118 | His | 8.71 | 119.80 | 4.70          | -             | -    | - | 174.15 | 55.22 | 29.03 |
| 119 | His | 8.80 | 120.48 | 4.69          | -             | -    | - | 173.98 | 55.29 | 29.13 |
| 120 | His | 8.77 | 121.15 | 4.65          | -             | -    | - | 173.87 | 55.64 | 29.14 |
| 121 | His | 8.77 | 122.98 | 4.67          | -             | -    | - | 176.47 | 55.25 | 28.82 |

**Table 2 The values of  $^3J(\text{H}^{\text{N}}-\text{H}^{\alpha})$  BME-RL2 at pH 3.5**

|        | $^3J(\text{H}^{\text{N}}-\text{H}^{\alpha})$ , Hz |        | $^3J(\text{H}^{\text{N}}-\text{H}^{\alpha})$ , Hz |
|--------|---------------------------------------------------|--------|---------------------------------------------------|
| 2 Asn  | 6.8                                               | 69 Ala | 4.7                                               |
| 3 Gln  | 7.3                                               | 70 Gln | 5.7                                               |
| 4 Lys  | 6.1                                               | 71 Ile | 7.0                                               |
| 7 Ala  | 5.6                                               | 73 Gln | 6.5                                               |
| 8 Cys  | 6.4                                               | 75 Gln | 7.9                                               |
| 9 His  | 7.9                                               | 76 Tyr | 7.1                                               |
| 11 Asn | 6.8                                               | 77 Leu | 7.5                                               |
| 12 Asp | 8.3                                               | 79 Asn | 7.0                                               |
| 13 Glu | 6.8                                               | 80 Ser | 6.9                                               |
| 17 Tyr | 7.1                                               | 81 His | 7.9                                               |
| 18 Gln | 5.8                                               | 84 Thr | 6.8                                               |
| 20 Thr | 7.2                                               | 85 Val | 9.0                                               |
| 21 Ala | 5.0                                               | 86 Val | 7.5                                               |
| 31 Asn | 6.7                                               | 87 Arg | 7.1                                               |
| 33 Tyr | 5.8                                               | 88 Arg | 6.3                                               |
| 38 Thr | 7.8                                               | 90 Asn | 7.3                                               |
| 39 Asn | 6.5                                               | 94 Ser | 6.9                                               |
| 40 Leu | 5.9                                               | 95 Phe | 5.8                                               |

|        |     |            |     |
|--------|-----|------------|-----|
| 41 Tyr | 6.9 | 96 Ile     | 8.1 |
| 42 Gln | 7.6 | 97 Ala     | 5.5 |
| 43 Arg | 5.7 | 101 Lys    | 5.4 |
| 46 Ala | 6.1 | 102 Lys    | 6.4 |
| 47 Ile | 7.5 | 103 Ile    | 7.1 |
| 48 Ala | 5.1 | 104<br>Gln | 7.1 |
| 49 Ile | 7.0 | 105<br>Asp | 6.7 |
| 50 Asn | 6.9 | 106 Lys    | 6.6 |
| 51 Asn | 7.6 | 107 Ile    | 7.2 |
| 56 Arg | 6.7 | 108 Ile    | 8.6 |
| 57 Thr | 6.9 | 109 Ile    | 7.9 |
| 58 Tyr | 6.8 | 111 Thr    | 7.4 |
| 59 Tyr | 8.0 | 112 Ile    | 6.7 |
| 60 Ala | 5.8 | 115 Ser    | 6.4 |
| 61 Asn | 6.4 | 116 His    | 7.9 |
| 64 Val | 7.8 | 118 His    | 7.4 |
| 65 Val | 7.9 | 119 His    | 7.2 |
| 66 Arg | 6.7 | 120 His    | 6.7 |
| 68 His | 7.0 | 121 His    | 7.9 |

**Table 3 Relaxation data and SSP results for BME-RL2 at pH 3.5**

|       | T <sub>1</sub> , s | T <sub>2</sub> , s | T <sub>1</sub> / T <sub>2</sub> | NOE          | SSP    |
|-------|--------------------|--------------------|---------------------------------|--------------|--------|
| 1Met  | -                  | -                  | -                               | -            | -      |
| 2Asn  | 1.190±0.022        | 0.987±0.056        | 1.206±0.072                     | -1.589±0.065 | -0.133 |
| 3Gln  | 0.961±0.017        | 0.734±0.028        | 1.309±0.056                     | -0.942±0.050 | -0.133 |
| 4Lys  | 0.801±0.015        | 0.571±0.046        | 1.403±0.116                     | -0.569±0.099 | -0.161 |
| 5Gln  | 0.793±0.023        | 0.564±0.076        | 1.406±0.194                     | -0.347±0.082 | -      |
| 6Pro  | -                  | -                  | -                               | -            | -0.164 |
| 7Ala  | 0.687±0.014        | 0.347±0.017        | 1.977±0.103                     | 0.032±0.026  | -0.212 |
| 8Cys  | 0.685±0.020        | 0.551±0.081        | 1.243±0.187                     | -0.010±0.073 | -      |
| 9His  | 0.655±0.050        | 0.414±0.054        | 1.580±0.238                     | -0.084±0.110 | -0.045 |
| 10Glu | 0.700±0.016        | 0.468±0.086        | 1.495±0.277                     | -0.168±0.069 | -0.034 |
| 11Asn | 0.649±0.013        | 0.374±0.017        | 1.737±0.088                     | -0.138±0.056 | 0.005  |
| 12Asp | 0.668±0.019        | 0.357±0.029        | 1.871±0.160                     | 0.127±0.044  | 0.055  |
| 13Glu | 0.657±0.006        | 0.294±0.015        | 2.232±0.116                     | -0.004±0.019 | 0.022  |
| 14Arg | 0.678±0.038        | 0.390±0.042        | 1.741±0.210                     | -            | -      |
| 15Pro | -                  | -                  | -                               | -            | -      |
| 16Phe | -                  | -                  | -                               | -            | -0.139 |
| 17Tyr | 0.661±0.022        | 0.254±0.011        | 2.606±0.140                     | -0.120±0.030 | -0.106 |
| 18Gln | 0.609±0.032        | 0.248±0.021        | 2.452±0.243                     | -            | -0.027 |
| 19Lys | 0.670±0.017        | 0.264±0.012        | 2.542±0.136                     | -            | -0.026 |
| 20Thr | 0.685±0.031        | 0.282±0.022        | 2.426±0.219                     | -0.054±0.039 | -0.033 |
| 21Ala | 0.716±0.023        | 0.263±0.012        | 2.724±0.148                     | -0.166±0.056 | -      |
| 22Pro | -                  | -                  | -                               | -            | 0.112  |
| 23Tyr | 0.667±0.016        | 0.255±0.017        | 2.620±0.188                     | -0.029±0.032 | -0.088 |
| 24Val | 0.629±0.018        | 0.220±0.010        | 2.858±0.158                     | 0.140±0.048  | -      |
| 25Pro | -                  | -                  | -                               | -            | -0.077 |
| 26Met | 0.648±0.016        | 0.232±0.009        | 2.794±0.123                     | 0.158±0.017  | -0.134 |
| 27Tyr | 0.622±0.014        | 0.219±0.009        | 2.837±0.132                     | 0.146±0.033  | -0.134 |
| 28Tyr | 0.620±0.011        | 0.226±0.009        | 2.744±0.121                     | 0.199±0.037  | -0.059 |
| 29Val | 0.619±0.023        | 0.216±0.014        | 2.861±0.208                     | 0.028±0.032  | -      |
| 30Pro | -                  | -                  | -                               | -            | 0.121  |
| 31Asn | 0.662±0.018        | 0.242±0.012        | 2.737±0.155                     | 0.229±0.062  | 0.197  |
| 32Ser | 0.667±0.021        | 0.239±0.009        | 2.795±0.137                     | 0.067±0.027  | 0.197  |
| 33Tyr | 0.623±0.018        | 0.236±0.010        | 2.639±0.137                     | -            | -      |
| 34Pro | -                  | -                  | -                               | -            | 0.093  |
| 35Tyr | 0.640±0.022        | 0.188±0.006        | 3.404±0.165                     | 0.257±0.046  | 0.072  |
| 36Tyr | 0.611±0.012        | 0.201±0.006        | 3.046±0.105                     | 0.237±0.037  | 0.111  |
| 37Gly | 0.627±0.017        | 0.255±0.007        | 2.458±0.092                     | 0.198±0.040  | 0.084  |
| 38Thr | 0.639±0.010        | 0.259±0.009        | 2.463±0.090                     | 0.211±0.022  | 0.174  |
| 39Asn | 0.632±0.006        | 0.243±0.007        | 2.600±0.080                     | 0.219±0.032  | 0.2    |
| 40Leu | 0.625±0.016        | 0.226±0.002        | 2.768±0.075                     | 0.246±0.020  | 0.143  |

|       |             |             |             |              |        |
|-------|-------------|-------------|-------------|--------------|--------|
| 41Tyr | 0.605±0.009 | 0.221±0.006 | 2.735±0.083 | 0.086±0.026  | 0.097  |
| 42Gln | 0.613±0.014 | 0.236±0.012 | 2.592±0.145 | 0.330±0.052  | 0.11   |
| 43Arg | 0.616±0.013 | 0.252±0.015 | 2.446±0.150 | 0.155±0.025  | -0.051 |
| 44Arg | 0.627±0.009 | 0.241±0.010 | 2.599±0.114 | -            | -      |
| 45Pro | -           | -           | -           | -            | -0.153 |
| 46Ala | 0.680±0.013 | 0.261±0.007 | 2.605±0.084 | 0.066±0.022  | -0.189 |
| 47Ile | 0.709±0.016 | 0.275±0.007 | 2.577±0.084 | -0.093±0.029 | -0.125 |
| 48Ala | 0.697±0.009 | 0.258±0.004 | 2.702±0.056 | -0.216±0.029 | -0.103 |
| 49Ile | 0.750±0.011 | 0.287±0.008 | 2.615±0.080 | 0.012±0.020  | -0.092 |
| 50Asn | 0.707±0.013 | 0.282±0.011 | 2.512±0.107 | 0.073±0.020  | -0.118 |
| 51Asn | 0.749±0.021 | 0.301±0.023 | 2.483±0.205 | -0.137±0.028 | -      |
| 52Pro | -           | -           | -           | -            | 0      |
| 53Tyr | 0.652±0.015 | 0.250±0.013 | 2.605±0.147 | 0.059±0.025  | -0.064 |
| 54Val | 0.679±0.015 | 0.228±0.005 | 2.982±0.090 | 0.029±0.027  | -      |
| 55Pro | -           | -           | -           | -            | 0.051  |
| 56Arg | 0.678±0.017 | 0.278±0.007 | 2.440±0.088 | 0.011±0.023  | -0.001 |
| 57Thr | 0.677±0.013 | 0.263±0.011 | 2.578±0.115 | 0.052±0.022  | -0.023 |
| 58Tyr | 0.668±0.022 | 0.257±0.012 | 2.601±0.147 | 0.015±0.075  | -0.023 |
| 59Tyr | 0.660±0.010 | 0.255±0.005 | 2.592±0.067 | -0.076±0.019 | -0.002 |
| 60Ala | 0.690±0.016 | 0.296±0.010 | 2.329±0.094 | -0.062±0.021 | -0.116 |
| 61Asn | 0.754±0.014 | 0.313±0.007 | 2.410±0.069 | -0.250±0.022 | -      |
| 62Pro | -           | -           | -           | -            | -0.033 |
| 63Ala | 0.690±0.012 | 0.303±0.011 | 2.278±0.093 | -0.066±0.053 | 0.052  |
| 64Val | 0.732±0.013 | 0.320±0.012 | 2.291±0.093 | -0.260±0.024 | 0.052  |
| 65Val | 0.698±0.010 | 0.312±0.011 | 2.236±0.088 | -0.269±0.023 | 0.022  |
| 66Arg | 0.724±0.016 | 0.294±0.007 | 2.463±0.077 | -0.172±0.020 | -      |
| 67Pro | -           | -           | -           | -            | -0.055 |
| 68His | 0.723±0.015 | 0.305±0.009 | 2.375±0.087 | -0.330±0.021 | -0.216 |
| 69Ala | 0.760±0.014 | 0.350±0.013 | 2.170±0.091 | -0.283±0.020 | -0.216 |
| 70Gln | 0.793±0.012 | 0.336±0.008 | 2.359±0.066 | -0.156±0.021 | -0.204 |
| 71Ile | 0.756±0.018 | 0.325±0.016 | 2.324±0.131 | -0.281±0.025 | -      |
| 72Pro | -           | -           | -           | -            | -0.188 |
| 73Gln | 0.733±0.024 | 0.326±0.008 | 2.248±0.089 | -0.164±0.021 | -0.184 |
| 74Arg | 0.720±0.014 | 0.350±0.010 | 2.058±0.071 | -0.150±0.019 | -0.174 |
| 75Gln | 0.686±0.013 | 0.310±0.011 | 2.210±0.089 | -0.092±0.020 | -0.163 |
| 76Tyr | 0.696±0.015 | 0.346±0.016 | 2.009±0.100 | -0.146±0.019 | -0.132 |
| 77Leu | 0.700±0.013 | 0.301±0.009 | 2.326±0.085 | -0.159±0.019 | -      |
| 78Pro | -           | -           | -           | -            | 0.015  |
| 79Asn | 0.743±0.015 | 0.343±0.010 | 2.163±0.078 | -0.061±0.020 | 0.08   |
| 80Ser | 0.760±0.013 | 0.401±0.017 | 1.893±0.087 | -0.032±0.021 | 0.08   |
| 81His | 0.747±0.014 | 0.346±0.011 | 2.163±0.079 | -0.170±0.022 | -      |
| 82Pro | -           | -           | -           | -            | -      |
| 83Pro | -           | -           | -           | -            | 0.026  |

|        |             |             |             |              |        |
|--------|-------------|-------------|-------------|--------------|--------|
| 84Thr  | 0.774±0.015 | 0.347±0.010 | 2.230±0.079 | -0.413±0.026 | 0.047  |
| 85Val  | 0.742±0.014 | 0.317±0.014 | 2.344±0.110 | -0.302±0.020 | 0.003  |
| 86Val  | 0.752±0.013 | 0.317±0.005 | 2.372±0.056 | -0.338±0.023 | 0.046  |
| 87Arg  | 0.736±0.016 | 0.328±0.004 | 2.244±0.055 | -0.177±0.021 | -0.046 |
| 88Arg  | 0.744±0.015 | 0.296±0.005 | 2.514±0.066 | -0.132±0.019 | -      |
| 89Pro  | -           | -           | -           | -            | -0.106 |
| 90Asn  | 0.766±0.014 | 0.326±0.007 | 2.346±0.067 | -0.303±0.023 | -0.034 |
| 91Leu  | 0.732±0.024 | 0.415±0.026 | 1.763±0.126 | -            | -0.074 |
| 92His  | 0.749±0.015 | 0.344±0.008 | 2.177±0.066 | -0.239±0.057 | -      |
| 93Pro  | -           | -           | -           | -            | -0.035 |
| 94Ser  | 0.778±0.011 | 0.366±0.013 | 2.124±0.083 | -0.198±0.021 | -0.096 |
| 95Phe  | 0.744±0.011 | 0.365±0.011 | 2.040±0.069 | -0.160±0.017 | -0.12  |
| 96Ile  | 0.761±0.017 | 0.333±0.006 | 2.287±0.066 | -0.434±0.024 | -0.103 |
| 97Ala  | 0.737±0.015 | 0.364±0.008 | 2.028±0.061 | -0.306±0.023 | -0.164 |
| 98Ile  | 0.757±0.019 | 0.289±0.020 | 2.619±0.193 | -            | -      |
| 99Pro  | -           | -           | -           | -            | -      |
| 100Pro | -           | -           | -           | -            | -0.261 |
| 101Lys | 0.723±0.012 | 0.308±0.011 | 2.345±0.090 | -0.229±0.028 | -0.19  |
| 102Lys | 0.716±0.011 | 0.321±0.011 | 2.231±0.082 | -0.192±0.016 | -0.201 |
| 103Ile | 0.704±0.007 | 0.318±0.012 | 2.217±0.088 | -0.328±0.017 | -0.151 |
| 104Gln | 0.730±0.014 | 0.337±0.004 | 2.166±0.050 | -0.262±0.022 | -0.164 |
| 105Asp | 0.770±0.011 | 0.381±0.013 | 2.022±0.073 | -0.382±0.023 | -0.108 |
| 106Lys | 0.739±0.018 | 0.379±0.010 | 1.951±0.070 | -0.359±0.021 | -0.125 |
| 107Ile | 0.706±0.010 | 0.370±0.011 | 1.910±0.062 | -0.148±0.020 | -0.089 |
| 108Ile | 0.681±0.009 | 0.356±0.006 | 1.914±0.042 | -0.115±0.023 | -0.131 |
| 109Ile | 0.703±0.011 | 0.374±0.017 | 1.881±0.089 | -0.086±0.020 | -      |
| 110Pro | -           | -           | -           | -            | 0.006  |
| 111Thr | 0.729±0.014 | 0.458±0.018 | 1.592±0.071 | -0.419±0.022 | 0.001  |
| 112Ile | 0.745±0.015 | 0.463±0.008 | 1.608±0.043 | -0.481±0.020 | -0.026 |
| 113Gly | 0.747±0.014 | 0.497±0.014 | 1.505±0.051 | -0.285±0.019 | 0.094  |
| 114Gly | 0.826±0.017 | 0.634±0.018 | 1.302±0.045 | -0.599±0.025 | -0.005 |
| 115Ser | 0.830±0.011 | 0.668±0.052 | 1.243±0.098 | -0.610±0.024 | -0.059 |
| 116His | 0.786±0.013 | 0.642±0.022 | 1.225±0.047 | -0.422±0.020 | -0.062 |
| 117His | 0.808±0.017 | 0.688±0.046 | 1.175±0.082 | -0.300±0.042 | -0.06  |
| 118His | 0.838±0.016 | 0.706±0.055 | 1.188±0.096 | -0.922±0.033 | -0.161 |
| 119His | 0.879±0.016 | 0.756±0.051 | 1.163±0.081 | -0.633±0.024 | -0.155 |
| 120His | 0.935±0.016 | 0.843±0.040 | 1.109±0.056 | -1.015±0.031 | -0.141 |
| 121His | 1.090±0.017 | 1.022±0.045 | 1.067±0.050 | -1.416±0.043 | -0.122 |

**Table 4 Chemical shifts of BME-RL2 at pH=3.9 (Acetate buffer)**

| N  |     | $\delta H$ | $\delta N$ | $\delta H^\alpha$ | $\delta H^\beta$ | $\delta H^\gamma$ | $\delta H^\delta$ | $\delta C'$ | $\delta C^\alpha$ | $\delta C^\beta$ |
|----|-----|------------|------------|-------------------|------------------|-------------------|-------------------|-------------|-------------------|------------------|
| 1  | Met | -          | -          | -                 |                  |                   |                   | 172.08      | 55.07             | 32.81            |
| 2  | Asn | 8.99       | 122.43     | 4.80              |                  |                   |                   | 174.76      | 53.36             | 38.84            |
| 3  | Gln | 8.64       | 121.78     | 4.34              |                  |                   |                   | 175.80      | 55.94             | 29.62            |
| 4  | Lys | 8.50       | 123.24     | 4.30              |                  |                   |                   | 176.42      | 56.50             | 32.96            |
| 5  | Gln | 8.50       | 123.05     | 4.62              |                  |                   |                   | 173.94      | 53.68             | 28.92            |
| 6  | Pro | -          | -          | -                 |                  |                   |                   | 176.50      | 63.08             | 32.10            |
| 7  | Ala | 8.48       | 124.10     | 4.31              |                  |                   |                   | 177.59      | 52.44             | 19.23            |
| 8  | Cys | 8.44       | 118.39     | 4.64              |                  |                   |                   | 174.57      | 55.40             | 41.12            |
| 9  | His | 8.78       | 121.19     | 4.75              |                  |                   |                   | 174.22      | 55.40             | 28.95            |
| 10 | Glu | 8.53       | 122.27     | 4.29              |                  |                   |                   | 175.99      | 56.57             | 29.41            |
| 11 | Asn | 8.66       | 119.67     | 4.71              |                  |                   |                   | 174.98      | 53.41             | 38.84            |
| 12 | Asp | 8.35       | 120.52     | 4.63              |                  |                   |                   | 175.87      | 54.19             | 40.28            |
| 13 | Glu | 8.35       | 120.66     | 4.35              |                  |                   |                   | 176.06      | 56.14             | 29.20            |
| 14 | Arg | 8.29       | 122.79     | 4.49              |                  |                   |                   | 174.13      | 54.40             | 30.07            |
| 15 | Pro | -          | -          | -                 |                  |                   |                   | 176.63      | 63.17             | 31.90            |
| 16 | Phe | 8.28       | 119.99     | 4.50              |                  |                   |                   | 175.36      | 58.04             | 39.48            |
| 17 | Tyr | 7.91       | 121.52     | 4.49              |                  |                   |                   | 175.11      | 57.74             | 38.92            |
| 18 | Gln | 8.13       | 122.54     | 4.26              |                  |                   |                   | 175.41      | 55.59             | 29.80            |
| 19 | Lys | 8.35       | 123.13     | 4.24              |                  |                   |                   | 176.68      | 56.78             | 33.07            |
| 20 | Thr | 8.11       | 115.04     | 4.28              |                  |                   |                   | 173.80      | 61.54             | 69.89            |
| 21 | Ala | 8.34       | 127.91     | 4.59              |                  |                   |                   | 175.36      | 50.61             | 18.44            |
| 22 | Pro | -          | -          | -                 |                  |                   |                   | 176.31      | 63.10             | 31.86            |
| 23 | Tyr | 8.24       | 120.83     | 4.53              |                  |                   |                   | 175.05      | 57.83             | 38.82            |
| 24 | Val | 7.91       | 126.33     | 4.25              |                  |                   |                   | 173.31      | 59.10             | 33.24            |
| 25 | Pro | -          | -          | -                 |                  |                   |                   | 176.42      | 63.07             | 31.98            |
| 26 | Met | 8.24       | 120.02     | 4.52              |                  |                   |                   | 175.47      | 55.60             | 33.18            |
| 27 | Tyr | 8.03       | 120.03     | -                 |                  |                   |                   | 174.85      | 57.27             | 39.05            |
| 28 | Tyr | -          | -          | -                 |                  |                   |                   | 174.63      | 57.73             | 39.25            |
| 29 | Val | 8.00       | 124.87     | -                 |                  |                   |                   | 173.87      | 59.36             | 33.03            |
| 30 | Pro | -          | -          | -                 |                  |                   |                   | 176.61      | 63.26             | 32.05            |
| 31 | Asn | 8.50       | 117.93     | 4.58              |                  |                   |                   | 174.94      | 53.69             | 38.61            |
| 32 | Ser | 8.08       | 114.75     | 4.26              |                  |                   |                   | 173.62      | 58.15             | 64.02            |
| 33 | Tyr | 8.17       | 122.84     | 4.75              |                  |                   |                   | 174.13      | 56.03             | 38.44            |
| 34 | Pro | -          | -          | -                 |                  |                   |                   | 176.06      | 63.27             | 31.54            |
| 35 | Tyr | 7.87       | 119.60     | -                 |                  |                   |                   | 175.48      | 57.85             | 38.82            |
| 36 | Tyr | 8.08       | 122.02     | 4.51              |                  |                   |                   | 176.05      | 57.89             | 38.92            |
| 37 | Gly | 7.78       | 109.77     | 3.92              |                  |                   |                   | 174.05      | 45.42             | -                |
| 38 | Thr | 8.07       | 112.78     | 4.36              |                  |                   |                   | 174.48      | 61.83             | 69.87            |
| 39 | Asn | 8.53       | 120.60     | 4.68              |                  |                   |                   | 175.25      | 53.45             | 38.62            |
| 40 | Leu | 8.13       | 121.97     | 4.19              |                  |                   |                   | 177.13      | 55.82             | 42.27            |
| 41 | Tyr | 8.05       | 119.25     | 4.50              |                  |                   |                   | 175.67      | 57.98             | 38.46            |
| 42 | Gln | 8.06       | 121.19     | 4.26              |                  |                   |                   | 175.41      | 55.74             | 29.58            |

|    |     |      |        |      |  |  |  |        |       |       |
|----|-----|------|--------|------|--|--|--|--------|-------|-------|
| 43 | Arg | 8.28 | 122.11 | 4.29 |  |  |  | 175.93 | 56.13 | 30.78 |
| 44 | Arg | 8.38 | 123.59 | 4.57 |  |  |  | 173.99 | 53.94 | 30.28 |
| 45 | Pro | -    | -      | -    |  |  |  | 176.42 | 63.04 | 32.12 |
| 46 | Ala | 8.44 | 124.60 | 4.28 |  |  |  | 177.66 | 52.54 | 19.25 |
| 47 | Ile | 8.07 | 119.84 | 4.14 |  |  |  | 175.72 | 60.81 | 38.98 |
| 48 | Ala | 8.39 | 128.45 | 4.37 |  |  |  | 177.41 | 52.33 | 19.35 |
| 49 | Ile | 8.16 | 120.34 | 4.15 |  |  |  | 175.85 | 61.12 | 38.97 |
| 50 | Asn | 8.51 | 122.29 | 4.68 |  |  |  | 174.27 | 53.11 | 38.99 |
| 51 | Asn | 8.39 | 120.53 | 4.95 |  |  |  | 173.32 | 51.25 | 38.96 |
| 52 | Pro | -    | -      | -    |  |  |  | 176.46 | 63.25 | 31.97 |
| 53 | Tyr | 8.25 | 120.39 | 4.58 |  |  |  | 175.25 | 58.00 | 38.46 |
| 54 | Val | 7.76 | 125.12 | 4.31 |  |  |  | 173.53 | 59.31 | 33.10 |
| 55 | Pro | -    | -      | -    |  |  |  | 176.76 | 62.95 | 32.09 |
| 56 | Arg | 8.44 | 121.41 | 4.31 |  |  |  | 176.38 | 56.24 | 30.91 |
| 57 | Thr | 8.08 | 115.01 | 4.26 |  |  |  | 173.81 | 61.70 | 69.83 |
| 58 | Tyr | 8.24 | 122.92 | 4.51 |  |  |  | 174.97 | 58.00 | 39.22 |
| 59 | Tyr | 8.06 | 122.40 | 4.47 |  |  |  | 174.80 | 57.50 | 39.21 |
| 60 | Ala | 8.12 | 125.87 | 4.23 |  |  |  | 176.63 | 52.01 | 19.46 |
| 61 | Asn | 8.34 | 119.34 | 4.88 |  |  |  | 173.62 | 51.14 | 38.86 |
| 62 | Pro | -    | -      | -    |  |  |  | 176.56 | 63.33 | 32.11 |
| 63 | Ala | 8.26 | 123.12 | 4.27 |  |  |  | 177.81 | 52.55 | 19.15 |
| 64 | Val | 8.00 | 119.53 | 4.08 |  |  |  | 176.01 | 62.33 | 32.75 |
| 65 | Val | 8.27 | 125.26 | 4.09 |  |  |  | 175.80 | 62.15 | 32.58 |
| 66 | Arg | 8.50 | 126.88 | 4.64 |  |  |  | 174.03 | 53.77 | 30.23 |
| 67 | Pro | -    | -      | -    |  |  |  | 176.77 | 62.99 | 32.13 |
| 68 | His | 8.67 | 118.77 | 4.65 |  |  |  | 174.11 | 55.20 | 29.00 |
| 69 | Ala | 8.43 | 125.47 | 4.32 |  |  |  | 177.51 | 52.44 | 19.43 |
| 70 | Gln | 8.57 | 120.73 | 4.35 |  |  |  | 175.78 | 55.64 | 29.56 |
| 71 | Ile | 8.41 | 124.87 | 4.48 |  |  |  | 174.66 | 58.76 | 38.58 |
| 72 | Pro | -    | -      | -    |  |  |  | 176.77 | 63.23 | 32.15 |
| 73 | Gln | 8.56 | 121.28 | 4.29 |  |  |  | 176.13 | 55.85 | 29.61 |
| 74 | Arg | 8.46 | 122.79 | 4.27 |  |  |  | 175.84 | 56.29 | 30.80 |
| 75 | Gln | 8.48 | 121.82 | 4.31 |  |  |  | 175.28 | 55.68 | 29.74 |
| 76 | Tyr | 8.41 | 122.43 | 4.60 |  |  |  | 175.12 | 57.57 | 38.97 |
| 77 | Leu | 8.26 | 126.16 | 4.62 |  |  |  | 174.92 | 52.67 | 42.03 |
| 78 | Pro | -    | -      | -    |  |  |  | 176.77 | 63.25 | 31.93 |
| 79 | Asn | 8.57 | 118.22 | 4.66 |  |  |  | 175.23 | 53.24 | 38.61 |
| 80 | Ser | 8.20 | 115.99 | 4.40 |  |  |  | 173.88 | 58.31 | 63.82 |
| 81 | His | 8.49 | 120.33 | 4.98 |  |  |  | 171.82 | 53.33 | 28.58 |
| 83 | Pro | -    | -      | -    |  |  |  | 176.96 | 62.97 | 32.01 |
| 84 | Thr | 8.40 | 116.19 | 4.30 |  |  |  | 174.42 | 62.15 | 69.79 |
| 85 | Val | 8.33 | 124.49 | 4.15 |  |  |  | 175.79 | 62.08 | 32.92 |
| 86 | Val | 8.42 | 126.28 | 4.08 |  |  |  | 175.88 | 62.24 | 32.73 |
| 87 | Arg | 8.57 | 126.59 | 4.35 |  |  |  | 175.80 | 55.72 | 30.85 |
| 88 | Arg | 8.54 | 124.45 | 4.61 |  |  |  | 174.24 | 53.94 | 30.15 |
| 89 | Pro | -    | -      | -    |  |  |  | 176.38 | 63.10 | 32.14 |

|     |     |      |        |      |  |  |  |        |       |       |
|-----|-----|------|--------|------|--|--|--|--------|-------|-------|
| 90  | Asn | 8.60 | 119.16 | 4.64 |  |  |  | 175.09 | 52.94 | 38.52 |
| 91  | Leu | 8.30 | 123.02 | 4.27 |  |  |  | 176.88 | 55.22 | 42.39 |
| 92  | His | 8.51 | 118.80 | 4.98 |  |  |  | 172.10 | 53.09 | 29.01 |
| 93  | Pro | -    | -      | -    |  |  |  | 176.88 | 63.18 | 32.28 |
| 94  | Ser | 8.52 | 116.47 | 4.43 |  |  |  | 174.00 | 58.27 | 63.80 |
| 95  | Phe | 8.29 | 122.46 | 4.69 |  |  |  | 175.03 | 57.60 | 39.90 |
| 96  | Ile | 8.05 | 124.28 | 4.07 |  |  |  | 175.02 | 60.53 | 38.89 |
| 97  | Ala | 8.35 | 129.09 | 4.29 |  |  |  | 177.20 | 52.13 | 19.20 |
| 98  | Ile | 8.29 | 123.13 | 4.44 |  |  |  | 174.40 | 58.42 | 38.68 |
| 100 | Pro | -    | -      | -    |  |  |  | 176.90 | 62.73 | 32.16 |
| 101 | Lys | 8.41 | 121.93 | 4.25 |  |  |  | 176.61 | 56.31 | 33.23 |
| 102 | Lys | 8.46 | 123.67 | 4.33 |  |  |  | 176.48 | 56.27 | 33.15 |
| 103 | Ile | 8.36 | 123.80 | 4.16 |  |  |  | 176.22 | 61.07 | 38.66 |
| 104 | Gln | 8.59 | 125.17 | 4.34 |  |  |  | 175.50 | 55.86 | 29.54 |
| 105 | Asp | 8.47 | 122.53 | 4.59 |  |  |  | 175.71 | 54.22 | 40.56 |
| 106 | Lys | 8.33 | 121.75 | 4.32 |  |  |  | 176.15 | 56.26 | 33.11 |
| 107 | Ile | 8.26 | 123.43 | 4.14 |  |  |  | 175.91 | 61.06 | 38.50 |
| 108 | Ile | 8.44 | 127.29 | 4.19 |  |  |  | 175.91 | 60.43 | 38.41 |
| 109 | Ile | 8.48 | 128.91 | 4.49 |  |  |  | 174.59 | 58.24 | 38.34 |
| 110 | Pro | -    | -      | -    |  |  |  | 176.92 | 63.17 | 32.22 |
| 111 | Thr | 8.35 | 115.53 | 4.33 |  |  |  | 174.82 | 61.86 | 69.83 |
| 112 | Ile | 8.34 | 124.06 | 4.21 |  |  |  | 176.87 | 61.26 | 38.71 |
| 113 | Gly | 8.64 | 113.48 | 4.00 |  |  |  | 174.79 | 45.37 | -     |
| 114 | Gly | 8.34 | 108.81 | 3.98 |  |  |  | 174.38 | 45.31 | -     |
| 115 | Ser | 8.32 | 115.21 | 4.37 |  |  |  | 174.79 | 58.42 | 63.65 |
| 116 | His | 8.61 | 119.86 | 4.67 |  |  |  | 174.22 | 55.22 | 28.49 |
| 117 | His | 8.51 | 118.88 | 4.66 |  |  |  | 174.20 | 55.26 | 28.83 |
| 118 | His | 8.73 | 120.00 | 4.70 |  |  |  | 174.21 | 55.28 | 29.19 |
| 119 | His | 8.81 | 120.71 | 4.70 |  |  |  | 174.01 | 55.41 | 29.12 |
| 120 | His | 8.67 | 120.87 | 4.66 |  |  |  | 173.57 | 55.55 | 29.33 |
| 121 | His | 8.50 | 125.78 | 4.46 |  |  |  | 178.95 | 57.24 | 29.86 |



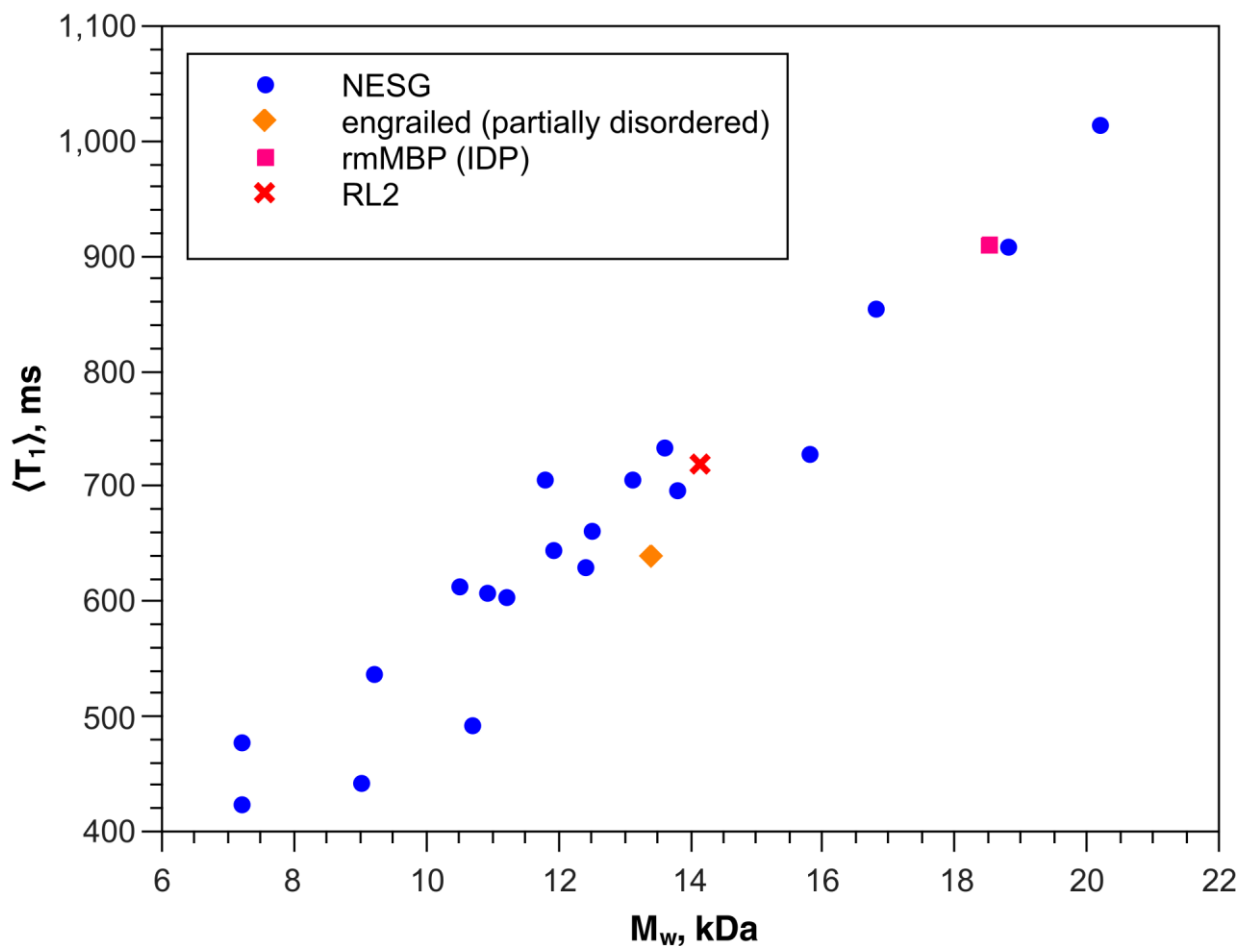

**Fig. S6.** Comparison of protein  $\langle T_1 \rangle$  values

1) **NESG targets**, 600MHz, 298K,

[http://www.nmr2.buffalo.edu/nesc.wiki/NMR\\_determined\\_Rotational\\_correlation\\_time](http://www.nmr2.buffalo.edu/nesc.wiki/NMR_determined_Rotational_correlation_time)

2) **engrailed**, 600MHz, 303K,  $\langle T_1 \rangle = 0.64$ s,  $M_w = 13.4$  kDa. Biophysical Journal 109(5) 988–999.

DOI: 10.1016/j.bpj.2015.06.069 (Calculated from SI data)

3) **rmMBP**, 600MHz, 300K,  $\langle T_1 \rangle = 0.91$ s,  $M_w = 18.5$  kDa. Biophysical Journal 94(12) 4847–4866.

DOI: 10.1529/biophysj.107.125823

4) **RL2**, 600MHz, 293.2K,  $\langle T_1 \rangle = 0.72$ s,  $M_w = 14.14$  kDa.

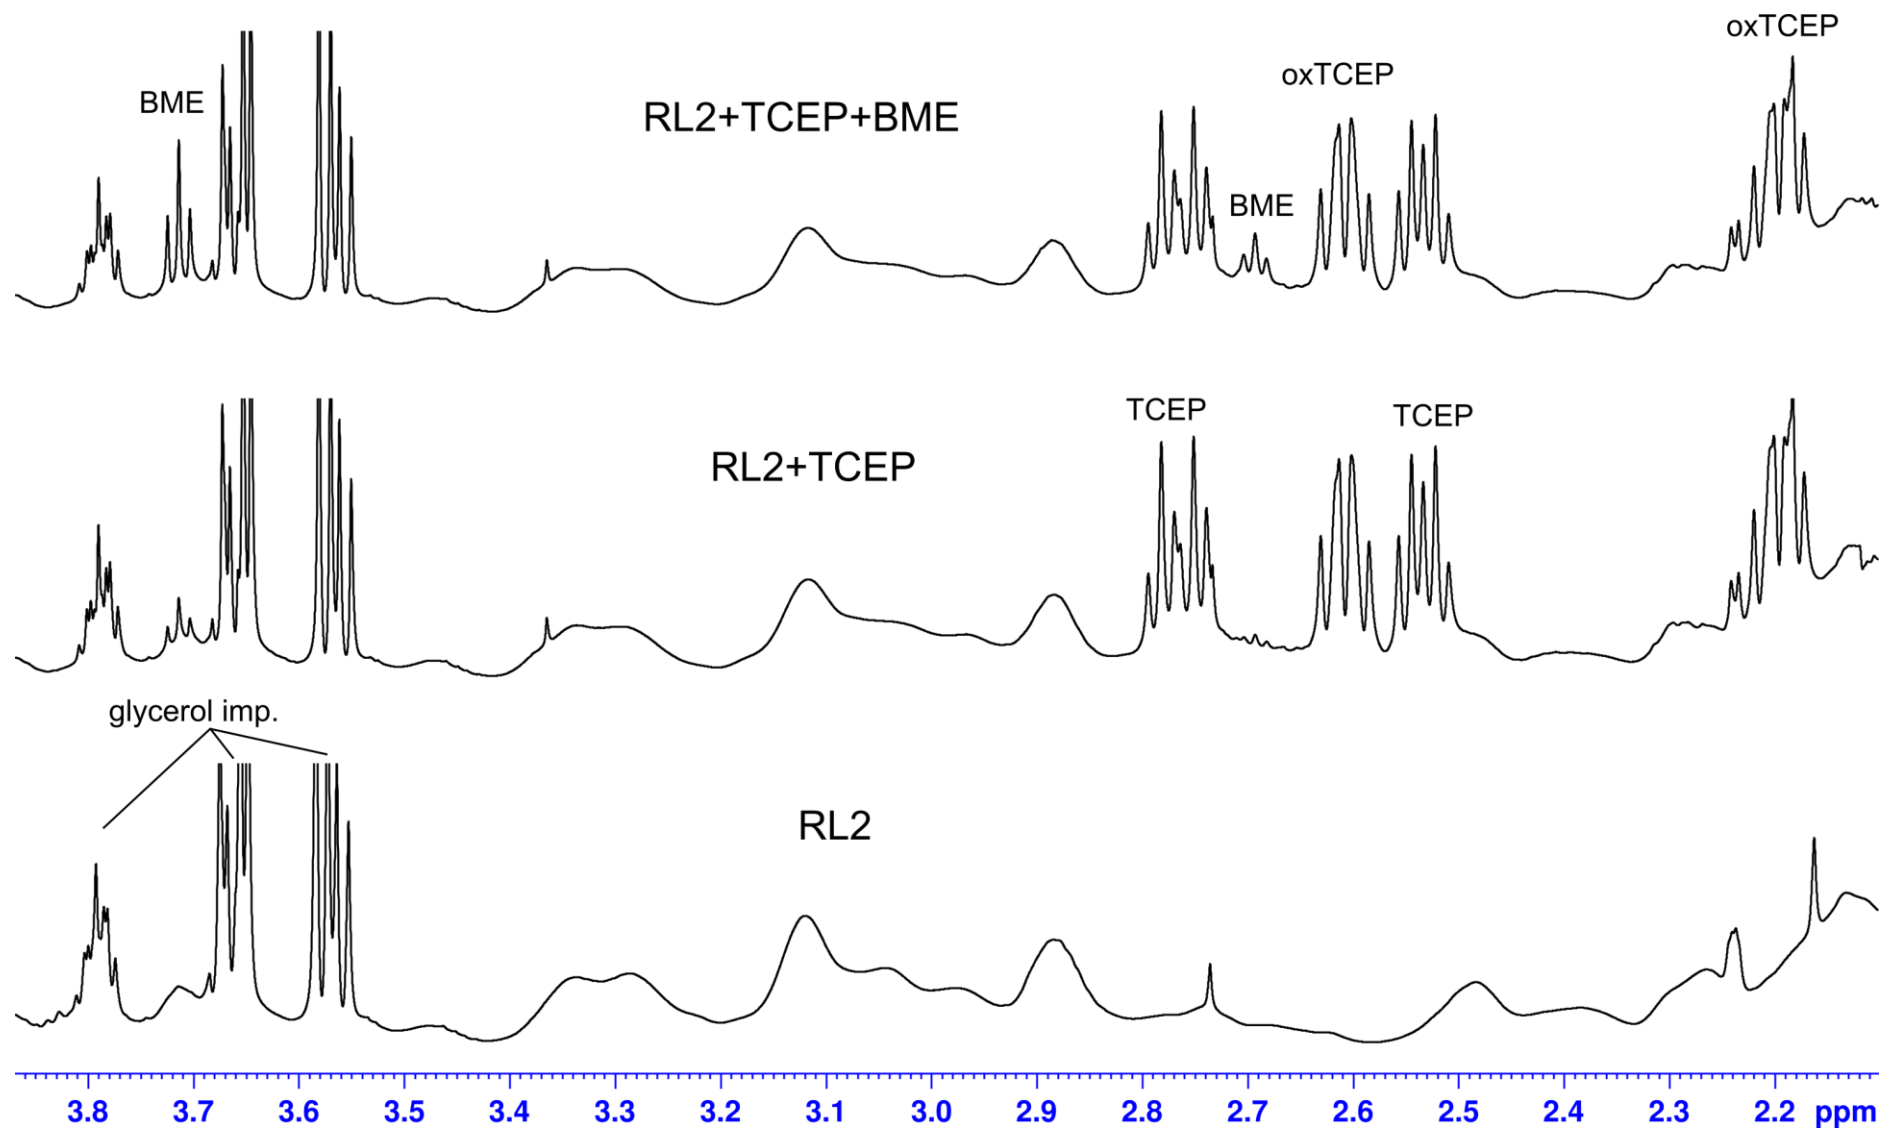

**Fig. S7.** Fragment of  $^1\text{H}$  NMR spectrum of  $[\text{U-}^{13}\text{C}, ^{15}\text{N}]\text{-RL2}$  (acetate buffer, pH 3.9): before (bottom) and after TCEP addition (middle), with external additive BME (top).

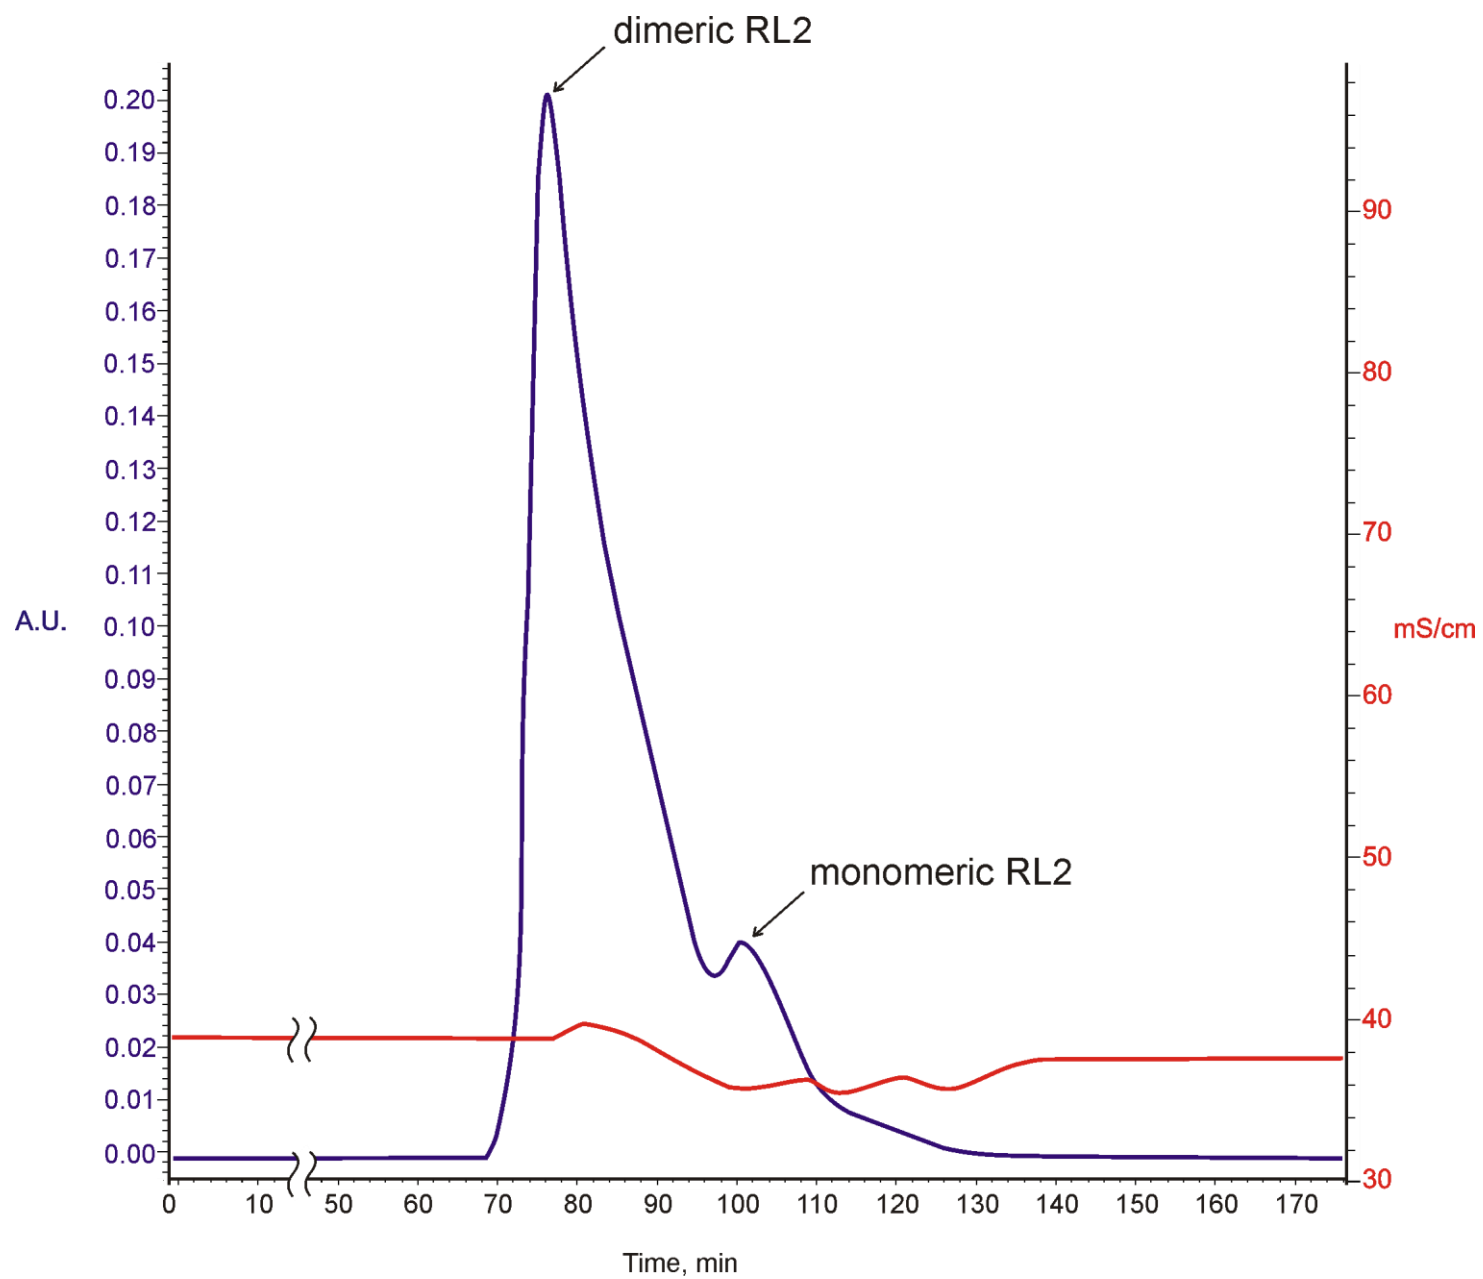

**Fig. S8.** Gel filtration chromatograms showing the separation of RL2 dimer from the monomer.
